# Supplementary material
Source: publisher site journal article supplement (https://www.dovepress.com/article/539885)
Supplement: Supplementary file 1 [file 539885%20Supplementary%20File.docx]

eFigure 1, Alpha diversity measured by Shannon Index across study groups (asthma vs. controls). No statistically significant differences were observed.

eFigure 2, Alpha diversity measured by Faith's Phylogenetic Diversity (PD) in asthma and control groups. No significant differences were found.

eFigure 3. Beta diversity analysis of gut microbiota using Bray-Curtis dissimilarity. The 3D visualization (Emperor plot) (A) shows clustering patterns between asthma (red) and control (green) groups. These patterns are statistically supported by PERMANOVA analysis (B), which demonstrates significant differences between the groups (p = 0.006).

**
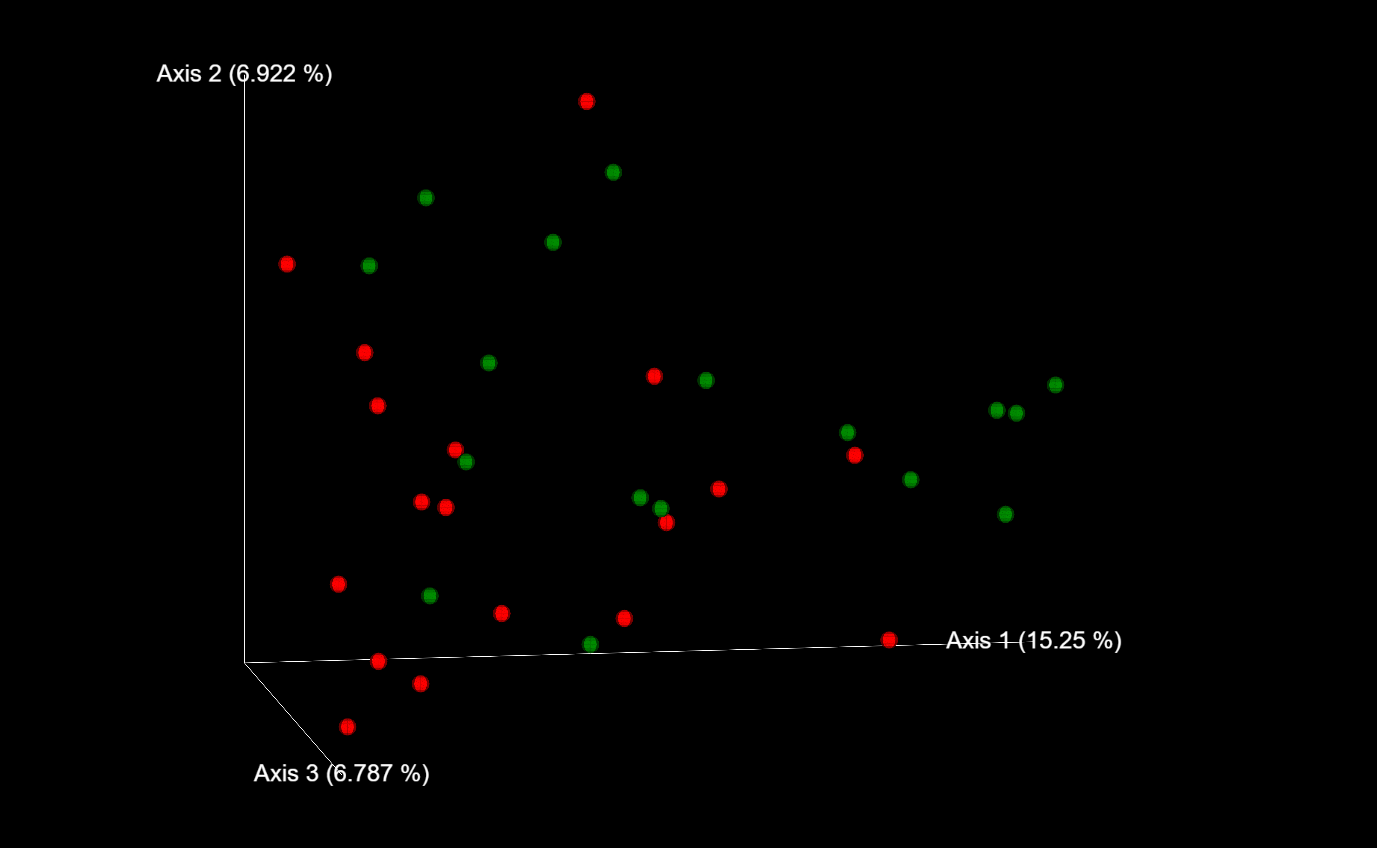
A**


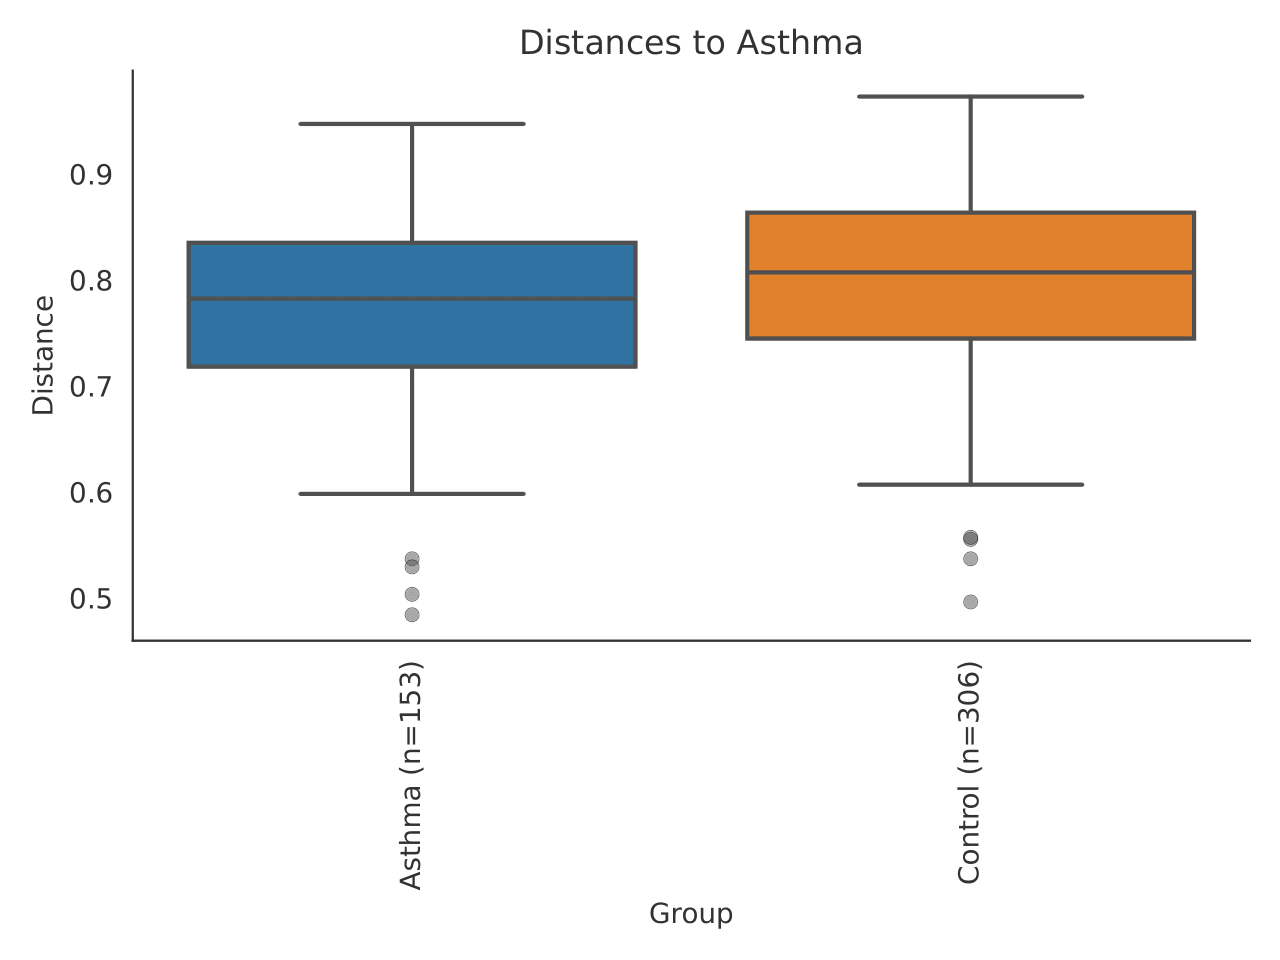
**B**


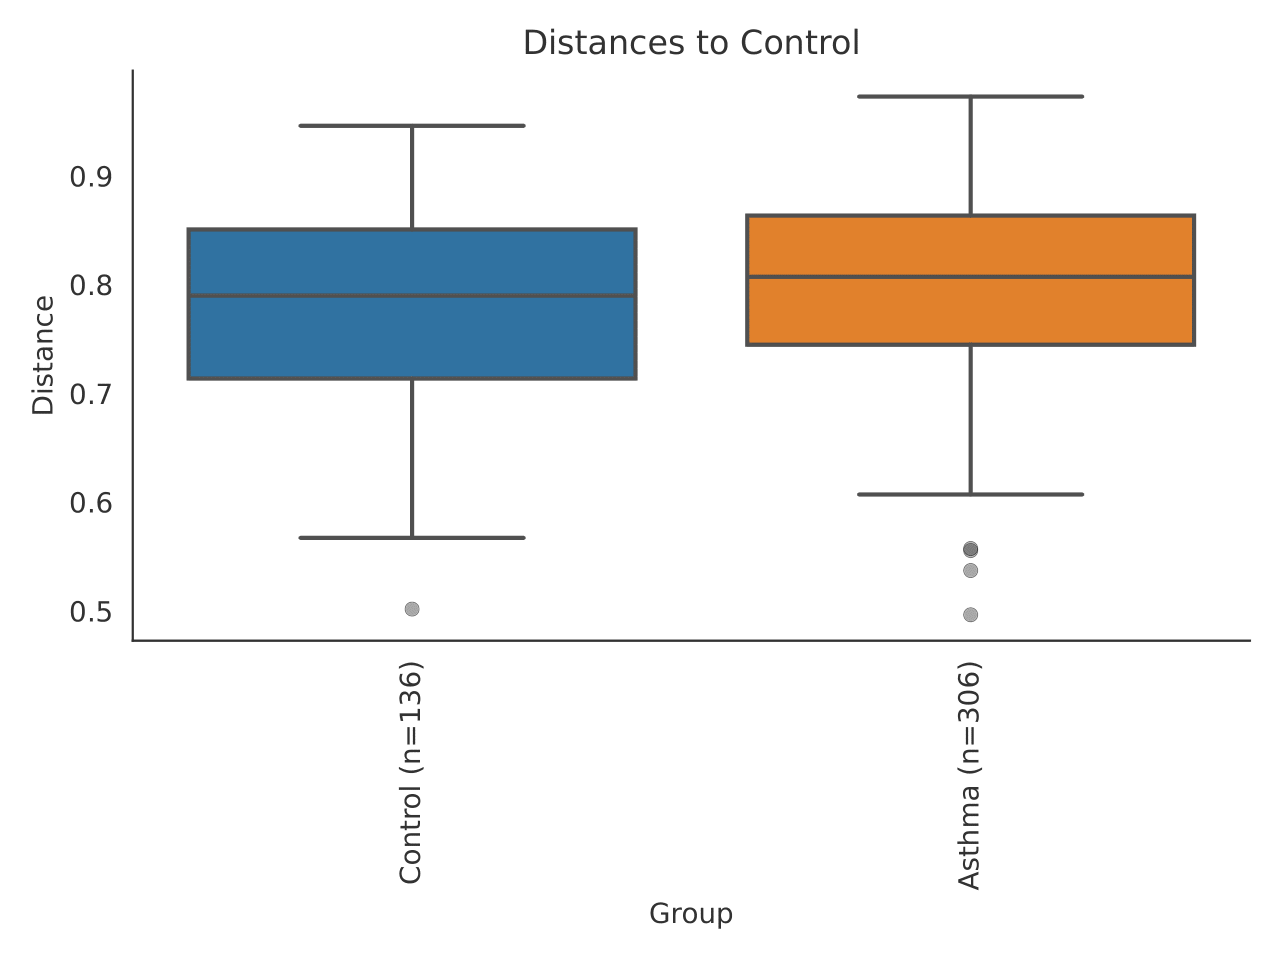


eFigure 4. Beta diversity analysis of gut microbiota using Jaccard dissimilarity. The 3D visualization (Emperor plot) (A) shows clustering patterns between asthma (red) and control (green) groups. These patterns are statistically supported by PERMANOVA analysis (B), which demonstrates significant differences between the groups (p = 0.007).

**
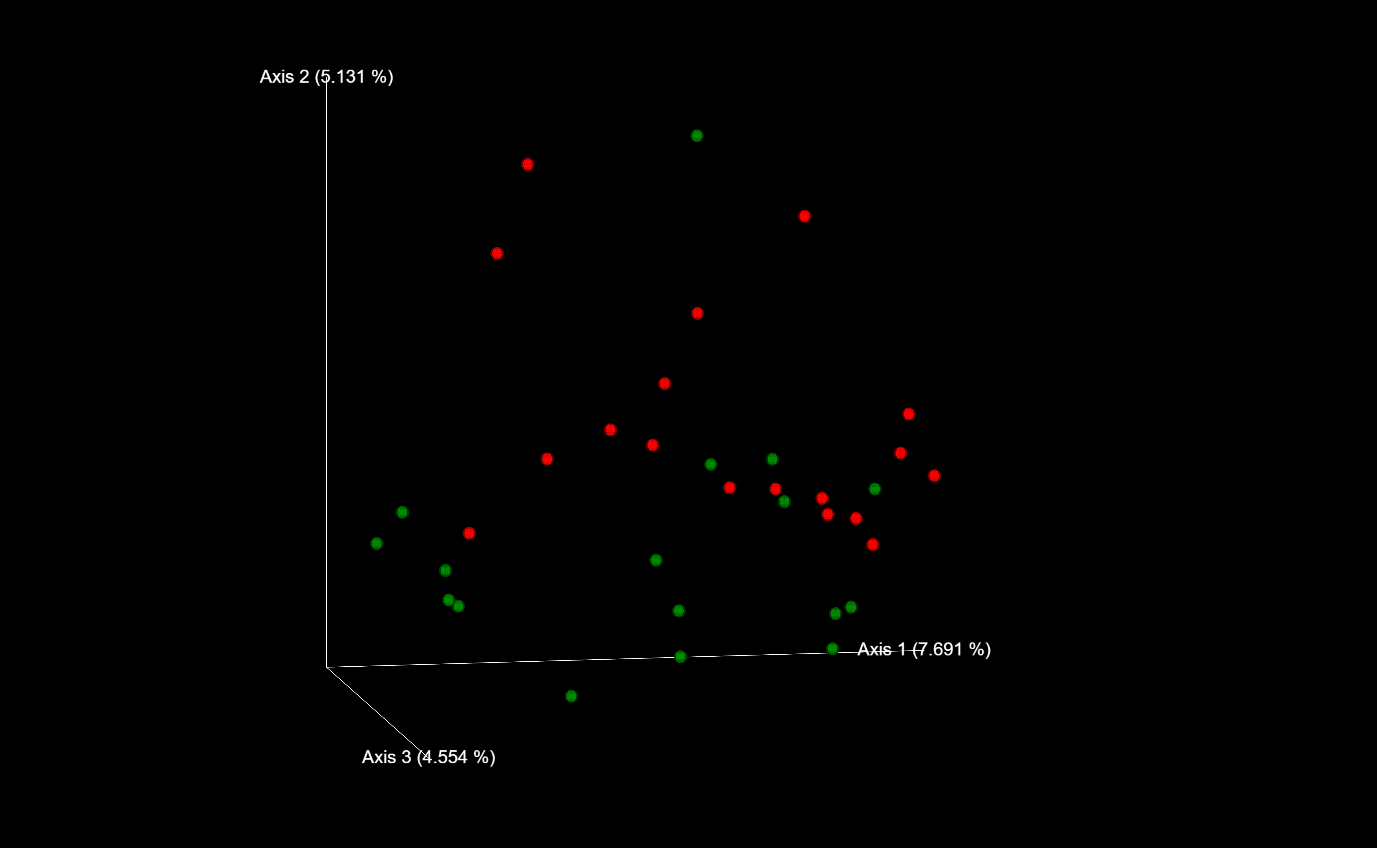
A**


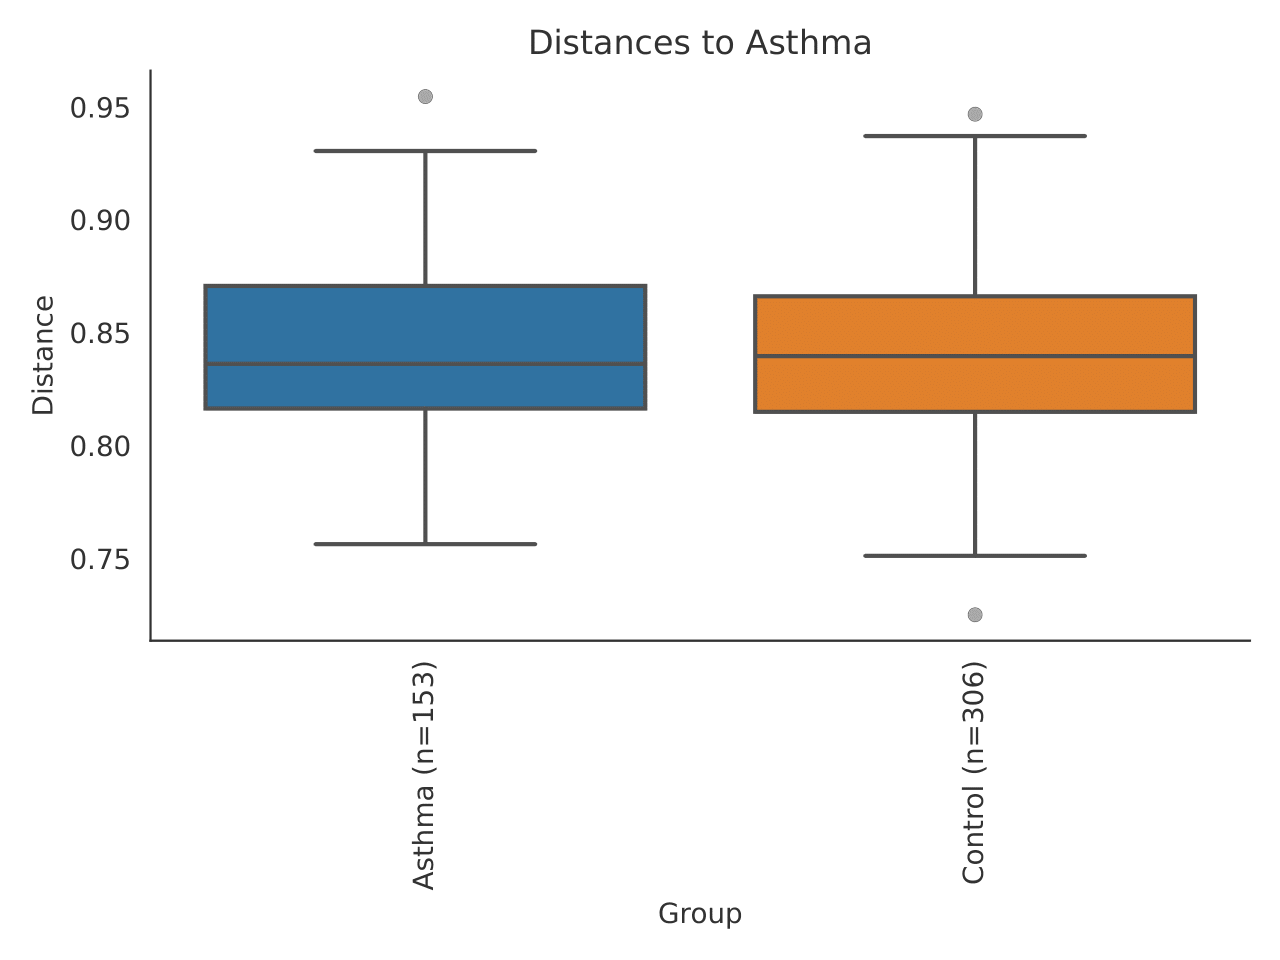

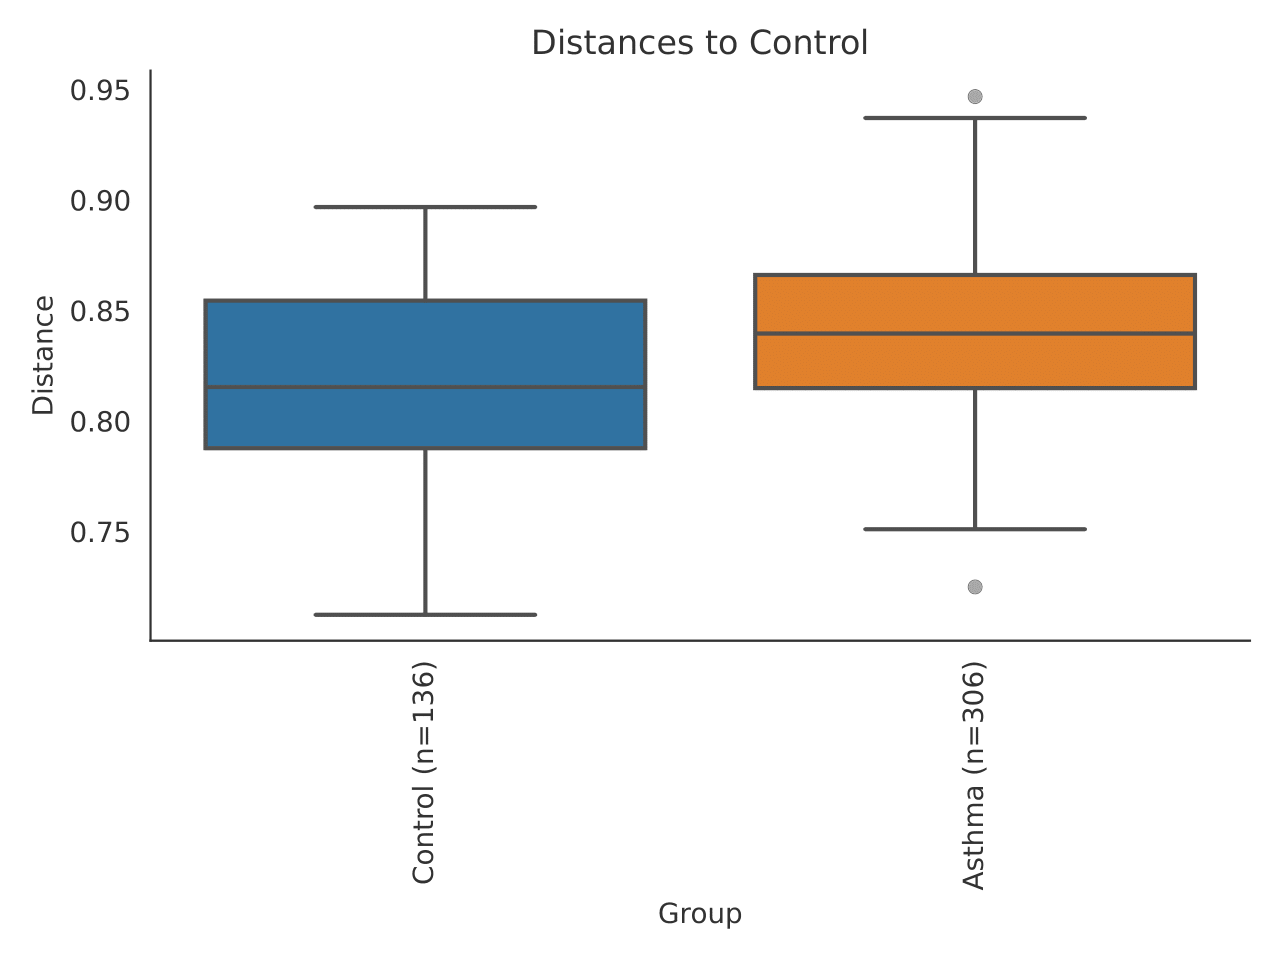
B

eTable 1. Characteristics of people participating in the first and second stages of the study

|  | Asthma | Control group |
| --- | --- | --- |
| Age | | |
| Min | 20,0 | 32,0 |
| Max | 70,0 | 70,0 |
| Median | 51,14 | 50,89 |
| SD | 11,71 | 11,20 |
| Gender | | |
| Female | 34 (69,4%) | 10 (55,6%) |
| Male | 15 (30,6%) | 8 (44,4%) |
| Occurrence of food allergy | | |
| Yes | 8 (16,3%) | 1 (5,6%) |
| No | 38 (77,6%) | 17 (94,4%) |
| Occurrence of food hypersensitivity | | |
| Yes | 11 (22,4%) | 1 (5,6%) |
| No | 35 (71,4%) | 17 (94,4%) |
|  | Weight |  |
| Min | 49,0 | 58,0 |
| Max | 140,0 | 112,0 |
| Median | 79,71 | 77,12 |
| SD | 17,92 | 14,46 |
|  | Height |  |
| Min | 1,53 | 1,55 |
| Max | 1,90 | 1,87 |
| Median | 1,67 | 1,71 |
| SD | 0,08 | 0,09 |
| BMI | | |
| Min | 17,87 | 19,16 |
| Max | 40,91 | 32,03 |
| Median | 28,45 | 26,14 |
| SD | 5,02 | 3,35 |

**SD** standard deviation

eTable 2. Details regarding the diagnosis among the examined patients - stages I and II

| Type of asthma | number of patients | % |
| --- | --- | --- |
| Controlled | 20 | 40,8 |
| Partially controlled | 9 | 18,4 |
| Uncontrolled | 16 | 32,7 |
| No answer | 4 | 8,2 |

eTable 3. Characteristics of people participating in the third stage of the study

|  | **Asthma** | **Control group** |
| --- | --- | --- |
| Age | | |
| Min | 33 | 32 |
| Max | 70 | 70 |
| Median | 50,63 | 51,06 |
| SD | 11,49 | 11,39 |
| Gender | | |
| Female | 11 (68,8%) | 10 (55,6%) |
| Male | 5 (31,3%) | 8 (44,4%) |
| Min | 19,72 | 19,16 |
| Max | 40,90 | 32,03 |
| Median | 29,05 | 26,15 |
| SD | 5,56 | 3,35 |
| Occurrence of food allergy | | |
| Yes | 2 (12,5%) | 1 (5,6%) |
| No | 14 (87,5%) | 17 (94,4%) |
| Occurrence of food hypersensitivity | | |
| Yes | 13 (81,3%) | 0 |
| No | 1 (6,3%) | 18 (100%) |
| No answer | 2 (12,5%) | 0 |

**SD** standard deviation

eTable 4. Details regarding the diagnosis among the examined patients - stage III

| Type of asthma | Number of patients | % |
| --- | --- | --- |
| Well controlled | 8 | 50% |
| Partially controlled | 4 | 25% |
| Uncontrolled | 3 | 19% |
| No answer | 1 | 6% |

eTable 5. Level of asthma control based on assessment over the last 4 weeks

| Criterion | **Well controlled asthma**  All criteria achieved | **Partially controlled asthma**  1-2 of the above criteria are achieved | **Uncontrolled asthma**  3-4 of the above criteria are achieved |
| --- | --- | --- | --- |
| limitation of exercise tolerance | no | yes | yes |
| night wakings | no | yes | yes |
| symptoms during the day | no more than twice a week | more than twice a week | more than twice a week |
| the need to use SABA | no more than twice a week | more than twice a week | more than twice a week |

eTable 6. Analysis of eating habits in the last 12 months in the study groups, p-value in all groups p >0,05

| **Products** | **Group** | **N** | **M** | **SD** | **Minimum** | **Maximum** |
| --- | --- | --- | --- | --- | --- | --- |
|
| Sweets |
| Asthma | 50 | 2,51 | 0,61 | 1,43 | 4,20 |
| Control | 13 | 2,45 | 0,33 | 2,14 | 3,14 |
|
| Dairy products |
| Asthma | 50 | 2,91 | 0,79 | 1,33 | 5,33 |
| Control | 13 | 2,90 | 0,46 | 2,17 | 4,00 |
|
| Cereal products |
| Asthma | 50 | 3,00 | 0,53 | 1,80 | 4,60 |
| Control | 13 | 2,78 | 0,47 | 2,20 | 3,60 |
|
| Fats |
| Asthma | 50 | 2,79 | 0,69 | 1,20 | 4,33 |
| Control | 13 | 2,37 | 0,54 | 1,67 | 3,33 |
|
| Fruits |
| Asthma | 50 | 2,82 | 0,46 | 1,80 | 3,64 |
| Control | 13 | 2,59 | 0,38 | 2,00 | 3,27 |
|
| Vegetables |
| Asthma | 50 | 3,28 | 0,53 | 2,00 | 4,73 |
| Control | 13 | 3,00 | 0,44 | 2,36 | 4,00 |
|
| Meat and Fish |
| Asthma | 50 | 2,67 | 0,55 | 1,00 | 3,75 |
| Control | 13 | 2,55 | 0,39 | 1,88 | 3,13 |
|
| Drinks |
| Asthma | 50 | 1,95 | 0,49 | 1 | 3 |
| Control | 13 | 2,00 | 0,41 | 1 | 3 |
|

Note. N - count, M - arithmetic mean, SD - standard deviation

eTable 7. Intensification of symptoms related to the examined systems

| **Symptoms** | **M** | **SD** | **p-value (ANOVA)** |
| --- | --- | --- | --- |
| **Skin** | | | |
| Asthma | 10,39 | 6,42 | 0,000 |
| Control | 3,22 | 5,14 | 0,000 |
| **Respiratory system** | | | |
| Asthma | 19.90 | 6,20 | 0,000 |
| Control | 4,78 | 4,73 | 0,000 |
| **Gastrointestinal tract** | | | |
| Asthma | 13,61 | 7,47 | 0,000 |
| Control | 6,89 | 5,37 | 0,000 |

Note. M - arithmetic mean, SD - standard deviation
